# Supplementary material for: Body Image Perception in Adolescents: The Role of Sports Practice and Sex
Source: MDPI journal article supplement (doi:10.3390/ijerph192215119), 2022-11-16
Supplement: s1 [file s1]

Table S1. BSQ-14 items of the participants according to sport group and sex

|                                                                                                  | No sport M |       | Sport M |       | No sport F |       | Sport F |       | group |       |                 | sex  |       | group*sex       |     |       |                 |
|--------------------------------------------------------------------------------------------------|------------|-------|---------|-------|------------|-------|---------|-------|-------|-------|-----------------|------|-------|-----------------|-----|-------|-----------------|
| Item                                                                                             | M          | SD    | M       | SD    | M          | SD    | M       | SD    | F     | p     | Partial<br>ETA² | F    | p     | Partial<br>ETA² | F   | p     | Partial<br>ETA² |
| Have you been so worried about your shape that you have been feeling you ought to diet?          | 2.25       | 1.26  | 1.82    | 1.17  | 3.43       | 1.84  | 2.77    | 1.42  | 3.2   | 0.075 | 0.023           | 15.7 | 0.000 | 0.102           | 0.2 | 0.640 | 0.002           |
| Has being with thin people made you feel self-conscious about your shape?                        | 4.58       | 1.91  | 5.05    | 1.21  | 3.88       | 1.85  | 4.00    | 1.39  | 2.0   | 0.160 | 0.015           | 9.7  | 0.002 | 0.067           | 0.7 | 0.400 | 0.005           |
| Have you noticed the shape of other people and felt that your own shape compared unfavourably?   | 2.29       | 1.55  | 2.33    | 1.06  | 3.90       | 1.68  | 3.42    | 1.14  | 1.1   | 0.289 | 0.008           | 29.4 | 0.000 | 0.179           | 0.8 | 0.379 | 0.006           |
| Has being undressed, such as when taking a bath, made you feel fat?                              | 1.92       | 1.50  | 1.36    | 0.67  | 3.02       | 1.94  | 2.12    | 1.24  | 9.3   | 0.003 | 0.065           | 13.2 | 0.000 | 0.069           | 0.1 | 0.691 | 0.001           |
| Has eating sweets, cakes or other high calorie food made you fell fat?                           | 2.29       | 1.57  | 2.00    | 1.36  | 2.88       | 1.73  | 2.77    | 1.50  | 10.0  | 0.324 | 0.007           | 6.2  | 0.014 | 0.044           | 0.2 | 0.632 | 0.002           |
| Have you felt excessively large and rounded?                                                     | 2.46       | 1.61  | 1.62    | 0.88  | 3.16       | 1.80  | 2.38    | 1.24  | 10.9  | 0.001 | 0.075           | 8.4  | 0.004 | 0.059           | 0.1 | 0.718 | 0.001           |
| Have you felt ashamed of your body?                                                              | 1.67       | 1.61  | 1.13    | 0.47  | 2.92       | 1.99  | 1.69    | 1.23  | 11.2  | 0.001 | 0.079           | 12.2 | 0.001 | 0.083           | 1.2 | 0.272 | 0.009           |
| Has worry about your shape made you diet?                                                        | 2.08       | 1.41  | 1.77    | 1.09  | 2.75       | 1.62  | 2.65    | 1.38  | 0.7   | 0.412 | 0.005           | 9.6  | 0.002 | 0.066           | 0.2 | 0.634 | 0.002           |
| Have you thought that you are in the shape you are because you lack self-control?                | 2.21       | 1.72  | 1.59    | 1.16  | 2.24       | 1.42  | 2.12    | 1.40  | 1.6   | 0.206 | 0.012           | 1.2  | 0.278 | 0.009           | 0.9 | 0.353 | 0.006           |
| Have you worried about other people seeing rolls of fat around your waist or stomach?            | 2.33       | 1.88  | 1.77    | 1.16  | 3.25       | 1.89  | 2.31    | 1.16  | 8.7   | 0.004 | 0.060           | 7.1  | 0.008 | 0.050           | 0.4 | 0.676 | 0.001           |
| Have you felt that it is not fair that other people are thinner than you?                        | 1.54       | 1.44  | 1.10    | 0.38  | 1.98       | 1.50  | 1.81    | 0.98  | 2.9   | 0.092 | 0.021           | 7.7  | 0.006 | 0.054           | 0.7 | 0.421 | 0.005           |
| Has seeing your reflection (e.g. in a mirror or shop window) made you feel bad about your shape? | 2.17       | 1.88  | 1.38    | 0.85  | 2.82       | 1.72  | 1.92    | 1.06  | 11.0  | 0.001 | 0.075           | 5.7  | 0.019 | 0.040           | 0.0 | 0.945 | 0.000           |
| Have you been particularly self-conscious about your shape when in the company of other people?  | 4.33       | 1.81  | 3.74    | 1.25  | 4.57       | 1.17  | 4.00    | 1.13  | 6.9   | 0.010 | 0.049           | 1.2  | 0.269 | 0.009           | 0.1 | 0.823 | 0.000           |
| Has worry about your shape made you feel you ought to exercise?                                  | 2.54       | 1.47  | 3.38    | 1.63  | 3.00       | 1.22  | 3.58    | 1.47  | 6.0   | 0.016 | 0.042           | 1.7  | 0.198 | 0.012           | 0.2 | 0.651 | 0.002           |
| Total score                                                                                      | 80.14      | 32.97 | 71.86   | 19.45 | 101.19     | 35.29 | 88.74   | 25.61 | 6.6   | 0.011 | 0.47            | 14.3 | 0.000 | 0.96            | 0.0 | 0.847 | 0.000           |
